# Supplementary material for: A stable nanotubular metal–organic framework as heterogeneous catalyst for efficient chemical fixation of CO2
Source: Royal Society of Chemistry journal article supplement (doi:10.1039/d3qi00343d), 2023-01-01
Supplement: d3qi00343d1.pdf [file d3qi00343d1.pdf]

Supporting Information for

**A Stable Nanotubular Metal–Organic Framework as Heterogeneous  
Catalyst for Efficient Chemical Fixation of CO<sub>2</sub>**

Xueqin Tian,<sup>a</sup> Xuefu Hu,<sup>b</sup> Wenjing Zhao,<sup>a</sup> Pengyan Wu,<sup>\*a</sup> Yan Wu,<sup>a</sup> Xin Xie,<sup>a</sup>  
Fangmin Huang,<sup>\*a</sup> Jinwen Cheng<sup>a</sup> and Jian Wang<sup>\*a</sup>

<sup>a</sup> School of Chemistry and Materials Science, Jiangsu Key Laboratory of Green  
Synthetic Chemistry for Functional Materials, Jiangsu Normal University,  
Xuzhou, 221116, P. R. China.

<sup>b</sup> Department of Chemistry, Southern University of Science and Technology,  
Shenzhen, Guangdong 518055, P. R. China

E-mail address: [wpyan@jsnu.edu.cn](mailto:wpyan@jsnu.edu.cn); [huangfm@jsnu.edu.cn](mailto:huangfm@jsnu.edu.cn); [wjian@jsnu.edu.cn](mailto:wjian@jsnu.edu.cn)

## Materials and Characterizations

Unless otherwise specified, all reagents and solvents are AR grade and do not need further purification when used. 4,4',4''-tricarboxyltriphenylamine (H<sub>3</sub>tca) was synthesized according to the literature methods.<sup>S1</sup> Cd(NO<sub>3</sub>)<sub>2</sub>·4H<sub>2</sub>O was purchased from Shanghai Fourth Chemical Reagent Company (China). The epoxides (epichlorohydrin, epibromohydrin, glycidol, allyl glycidyl ether, butyl glycidyl ether, glycol diglycidyl ether, 2-(phenoxyethyl) oxirane, 2-((4-nitrophenoxy)methyl) oxirane, 2-((4-methoxyphenoxy)methyl)oxirane, 1,3-bis(oxiran-2-ylmethoxy)benzene) and Tetrabutylammonium Bromide (TBABr) were purchased from Beijing Innochem Science & Technology Co., Ltd.

JASCO FT/IR-430 machine was used to test FT-IR spectra of the sample KBr pellets. Rigaku D/max-2400 X-ray powder diffractometer (Japan) was used to test X-Ray powder diffraction (XRD) patterns of the samples, its radiation wavelength was Cu-K $\alpha$  ( $\lambda = 1.5405 \text{ \AA}$ ). Bruker-400 spectrometer was used to test <sup>1</sup>H NMR spectra, its internal standard was Me<sub>4</sub>Si. The C, H and N elemental analyses were tested on a Vario EL III elemental analyzer. Hitachi SU8010 was used to test the morphologies of the prepared samples treated by Pt sputtering for 90 s by a Field Emission Scanning Electron Microscopy (SEM). FT-IR spectra were recorded as KBr pellets on JASCO FT/IR-430. X-ray photoelectron spectroscopy (XPS) experiments were performed with a PHI QUANTUM2000 surface analysis instrument. Rigaku Thermo plus TG-8120 instrument was used to test thermogravimetric analysis (TGA), its ramp rate was 5 °C/min and its flow was static air. Leeman PROFILE

SPEC inductively coupled plasma mass spectrometry (ICP-MS) was used to test the contents of metal ions.

### **Synthesis of Cd-TCA'**

Cd-TCA was firstly soaked in a methanol solution, and exchanged with the fresh methanol every 20 minutes. The removal of DMA molecules was confirmed through FT-IR. Then the compound was further desolvated under vacuum at 423 K for 12 h to afford the activated samples Cd-TCA'.

### **Crystallographic studies**

A suitable single crystal was mounted on a Bruker APEX II CCD diffractometer, whose monochromator is graphite and radiation is Mo-K $\alpha$  ( $\lambda = 0.71073 \text{ \AA}$ ). The direct methods was used for the solution of the structure and full-matrix least-squares cycles was used for the refinement in SHELXTL version 6.1. A riding model was used for the refinement of hydrogen atoms. SQUEEZE program within PLATON was used to remove disorder solvent molecules.

**Table S1.** Crystallographic data for Cd-TCA

| Cd-TCA                                             |                                                                                  |
|----------------------------------------------------|----------------------------------------------------------------------------------|
| formula                                            | C <sub>37</sub> H <sub>48</sub> N <sub>5</sub> O <sub>10</sub> Cd <sub>1.5</sub> |
| formula weight                                     | 891.40                                                                           |
| crystal system                                     | trigonal                                                                         |
| space group                                        | <i>R</i> -3 <i>c</i>                                                             |
| <i>a</i> /Å                                        | 41.5946(11)                                                                      |
| <i>b</i> /Å                                        | 41.5946(11)                                                                      |
| <i>c</i> /Å                                        | 28.0270(11)                                                                      |
| $\gamma$ (°)                                       | 120                                                                              |
| <i>V</i> /Å <sup>3</sup>                           | 41993(3)                                                                         |
| <i>Z</i>                                           | 36                                                                               |
| $\rho_{\text{calcd}}$ /g cm <sup>-3</sup>          | 1.269                                                                            |
| $\mu$ /mm <sup>-1</sup>                            | 5.959                                                                            |
| Collected reflections                              | 8233                                                                             |
| unique reflections                                 | 6820                                                                             |
| <i>R</i> <sub>1</sub> [ <i>I</i> > 2σ( <i>I</i> )] | 0.1074                                                                           |
| <i>wR</i> <sub>2</sub> (all data)                  | 0.3543                                                                           |
| CCDC                                               | 2193251                                                                          |

**Table S2** Selected bond lengths (Å) and angles (°) for Cd-TCA.

|                   |            |                   |            |
|-------------------|------------|-------------------|------------|
| Cd(1)–O(5A)       | 2.239(4)   | Cd(1)–O(5B)       | 2.239(4)   |
| Cd(1)–O(4C)       | 2.257(3)   | Cd(1)–O(4D)       | 2.257(3)   |
| Cd(1)–O(2E)       | 2.274(4)   | Cd(1)–O(2)        | 2.274(4)   |
| Cd(2)–O(6)        | 1.936(4)   | Cd(2)–O(1F)       | 1.938(4)   |
| Cd(2)–O(7)        | 1.982(5)   | Cd(2)–O(3G)       | 2.032(3)   |
| Cd(2)–O(4G)       | 2.416(4)   | Cd(2)–C(1G)       | 2.540(5)   |
| O(5A)–Cd(1)–O(5B) | 179.989(1) | O(5A)–Cd(1)–O(4C) | 87.06(15)  |
| O(5B)–Cd(1)–O(4C) | 92.95(14)  | O(5A)–Cd(1)–O(4D) | 92.94(14)  |
| O(5B)–Cd(1)–O(4D) | 87.05(15)  | O(4C)–Cd(1)–O(4D) | 180.0      |
| O(5A)–Cd(1)–O(2E) | 92.19(15)  | O(5B)–Cd(1)–O(2E) | 87.81(15)  |
| O(4C)–Cd(1)–O(2E) | 89.15(14)  | O(4D)–Cd(1)–O(2E) | 90.85(14)  |
| O(5A)–Cd(1)–O(2)  | 87.81(15)  | O(5B)–Cd(1)–O(2)  | 92.19(15)  |
| O(4C)–Cd(1)–O(2)  | 90.85(14)  | O(4D)–Cd(1)–O(2)  | 89.14(14)  |
| O(2E)–Cd(1)–O(2)  | 180.0      | O(6)–Cd(2)–O(1F)  | 135.76(16) |
| O(6)–Cd(2)–O(7)   | 96.09(19)  | O(1F)–Cd(2)–O(7)  | 94.6(2)    |
| O(6)–Cd(2)–O(3G)  | 108.92(16) | O(1F)–Cd(2)–O(3G) | 108.35(16) |
| O(7)–Cd(2)–O(3G)  | 107.6(2)   | O(6)–Cd(2)–O(4G)  | 89.35(16)  |
| O(1F)–Cd(2)–O(4G) | 90.68(17)  | O(7)–Cd(2)–O(4G)  | 165.65(19) |
| O(3G)–Cd(2)–O(4G) | 58.04(14)  | O(6)–Cd(2)–C(1G)  | 99.18(16)  |
| O(1F)–Cd(2)–C(1G) | 101.98(18) | O(7)–Cd(2)–C(1G)  | 136.5(2)   |
| O(3G)–Cd(2)–C(1G) | 28.94(17)  | O(4G)–Cd(2)–C(1G) | 29.16(16)  |

Symmetry code A:  $2/3+x-y$ ,  $4/3-y$ ,  $-1/6-z$ ; B:  $1-x+y$ ,  $y$ ,  $-1/2+z$ ; C:  $2-x$ ,  $1-x+y$ ,  $-1/2-z$ ; D:  $-1/3+x$ ,  $1/3+x-y$ ,  $-1/6+z$ ; E:  $5/3-x$ ,  $4/3-y$ ,  $-2/3-z$ ; F:  $5/3-y$ ,  $1/3+x-y$ ,  $1/3+z$ ; G:  $1-x+y$ ,  $y$ ,  $1/2+z$ .

**Figure S1.** The asymmetric unit of Cd-TCA. Atomic scheme: Cd, green; O, red; C, gray; N, blue; H, light green.

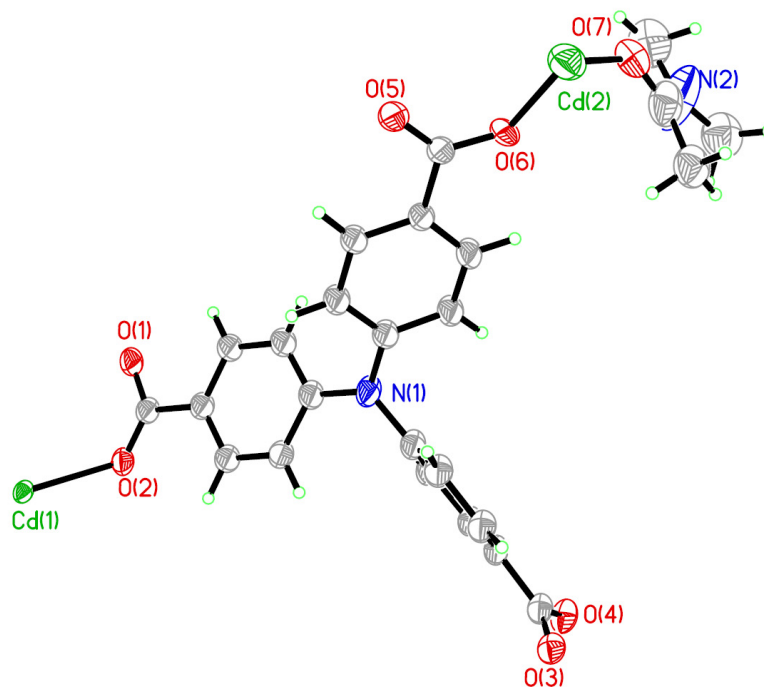

**Figure S2.** (a) The Cd coordination environment in Cd-TCA. (b) The  $\mu_6\text{-}\eta^1\text{:}\eta^1\text{:}\eta^1\text{:}\eta^1\text{:}\eta^1\text{:}\eta^2$  coordination mode of the  $\text{tca}^{3-}$  ligand.

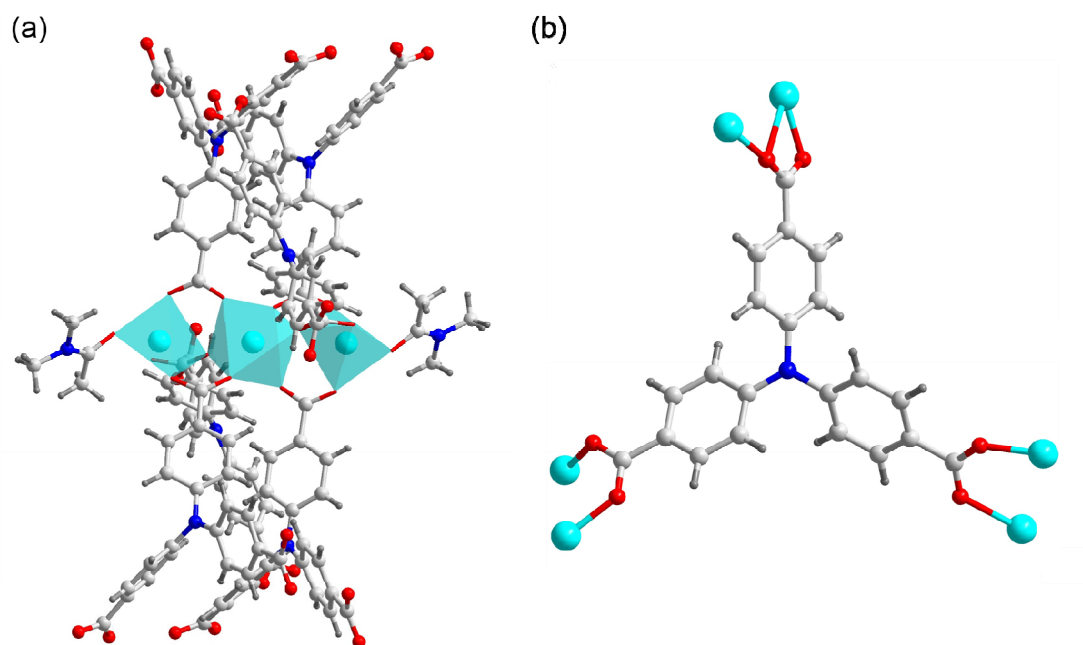

**Figure S3.** The “crown ether”-like hexagonal metallo-macrocycles extend infinitely along the ab plane with adjacent channels sharing the corrugated walls.

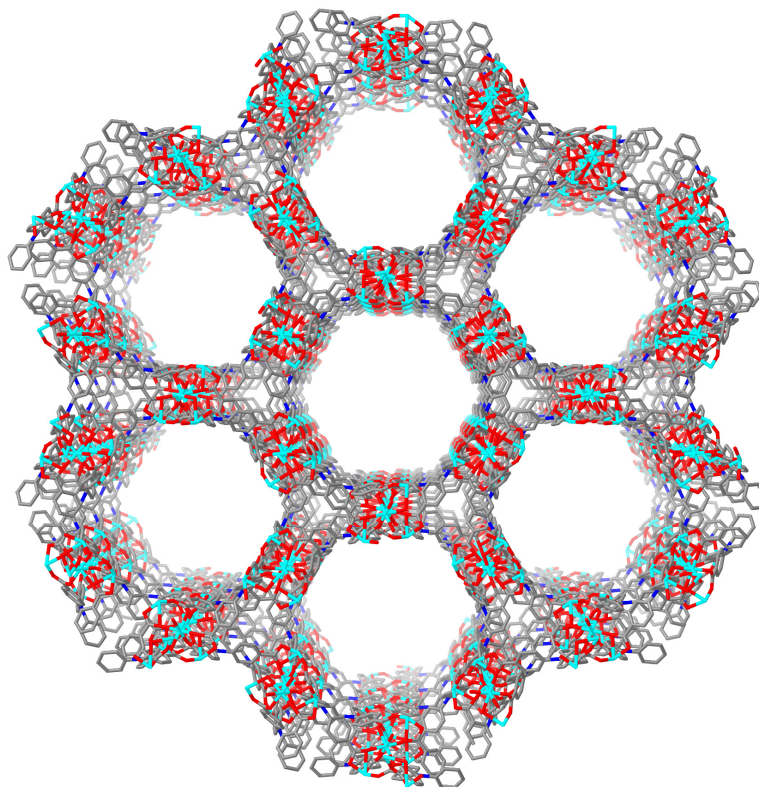



**Figure S4.** FT-IR of Cd-TCA and Cd-TCA'.

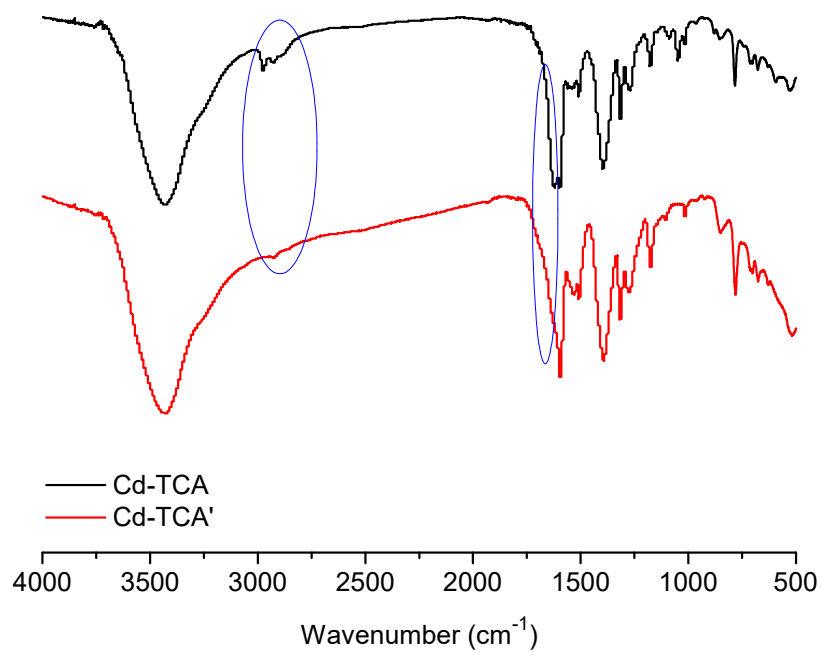

**Figure S5.** Optimized catalyst dosage and reaction temperature experiments of coupling of epichlorohydrin with CO<sub>2</sub>.

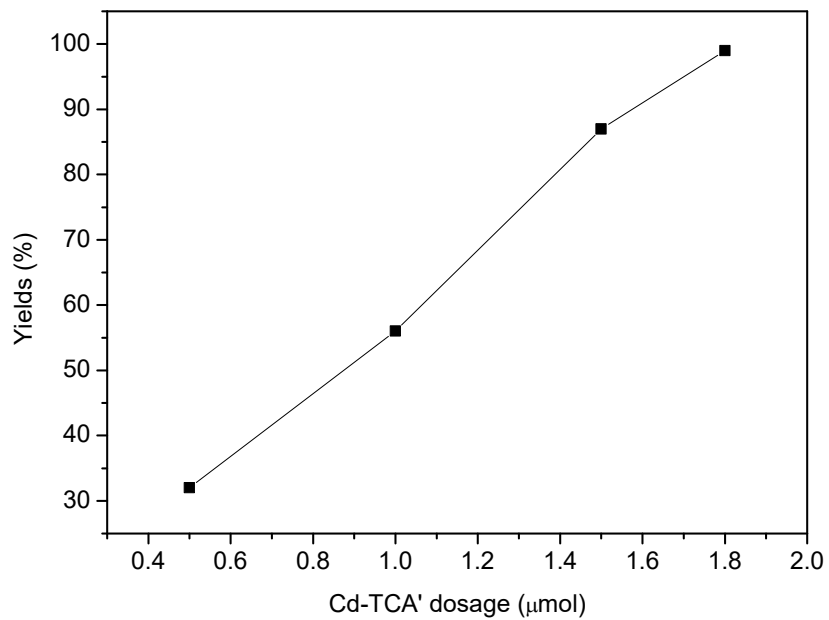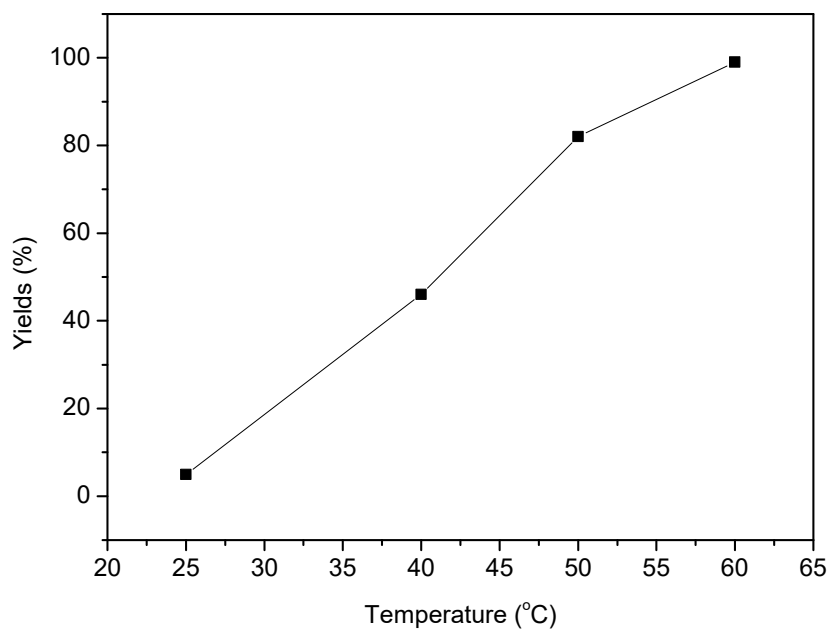

**Figure S6.** SEM image of Cd-TCA' (left) and Cd-TCA' after 5 cycles of catalysis (right).

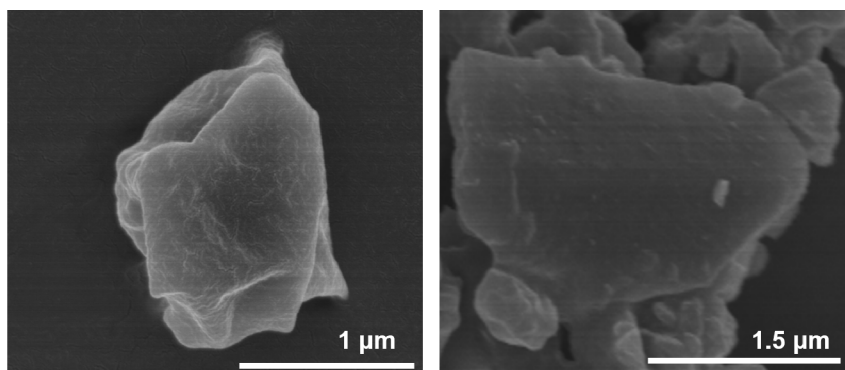

**Figure S7.** FT-IR spectra of Cd-TCA' (black), Cd-TCA' impregnated with epichlorohydrin (red) and epichlorohydrin (green).

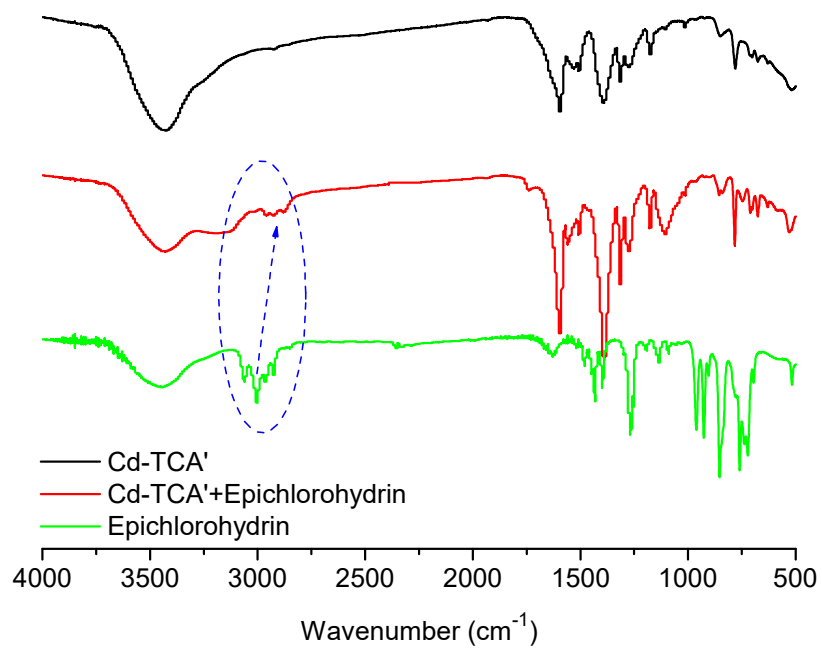

**Table S3.** Comparison with different MOFs catalysts in the cyclic addition of CO<sub>2</sub> and epichlorohydrin under similar conditions (0.1 MPa CO<sub>2</sub>).

| Entry | Catalyst                                | T (K) | T (hr) | Yield(%) | TON   | TOF  | Ref.             |
|-------|-----------------------------------------|-------|--------|----------|-------|------|------------------|
| 1     | ZIF-8-HS                                | 363   | 24     | 98       | /     | /    | S2               |
| 2     | PNU-25-NH <sub>2</sub>                  | 338   | 18     | 92       | 1380  | 76.7 | S3               |
| 3     | IL@MIL-101-SO <sub>3</sub> H            | 363   | 48     | 98       | /     | /    | S4               |
| 4     | polyILs@MIL-101                         | 343   | 24     | 94       | /     | /    | S5               |
| 5     | UiO-67-IL                               | 363   | 3      | 99       | /     | /    | S6               |
| 6     | Meim-UiO-66                             | 393   | 24     | 100      | 192   | 8    | S7               |
| 7     | 1                                       | 343   | 15     | 99       | 200   | 13   | S8               |
| 8     | Co(II)-MOF                              | 353   | 9      | 99       | /     | /    | S9               |
| 9     | Cu(II)-MOF                              | 343   | 16     | 99       | 4     | 0.25 | S10              |
| 10    | Ni-MOF-1a                               | 333   | 6      | 97       | 38.8  | 6.5  | S11              |
| 11    | 1                                       | 343   | 15     | 100      | 200   | 13.3 | S12              |
| 12    | 1                                       | 333   | 10     | 97       | 194   | 19.4 | S13              |
| 13    | 1                                       | 343   | 12     | 100      | 80    | 6.7  | S14              |
| 14    | FJI-C10                                 | 333   | 24     | 87       | 494   | 20.6 | S15              |
| 15    | 1                                       | 323   | 12     | 98       | 19.6  | 1.63 | S16              |
| 16    | F-NH <sub>2</sub> -Zr(H <sub>2</sub> L) | 333   | 48     | 85       | 850   | 17.7 | S17              |
| 17    | 1                                       | 333   | 12     | 99       | 247.5 | 20.6 | S18              |
| 18    | Cd-TCA'                                 | 333   | 6      | 100      | 1833  | 306  | <b>This work</b> |

**Table S4.** The molecular size of selected substrates.

| Entry | Epoxides                                   | Molecular Size                                                                       |
|-------|--------------------------------------------|--------------------------------------------------------------------------------------|
| 1     | <chem>ClCC1OC1</chem>                      | 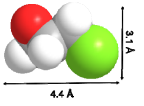   |
| 2     | <chem>BrCC1OC1</chem>                      |    |
| 3     | <chem>OCC1OC1</chem>                       |    |
| 4     | <chem>C=CCOC1OC1</chem>                    |    |
| 5     | <chem>CCCCOC1OC1</chem>                    |    |
| 6     | <chem>C1OC1CCOC2OC2</chem>                 |   |
| 7     | <chem>c1ccc(cc1)OCC1OC1</chem>             |  |
| 8     | <chem>COc1ccc(cc1)OCC1OC1</chem>           |  |
| 9     | <chem>[O-][N+](=O)c1ccc(cc1)OCC1OC1</chem> |  |
| 10    | <chem>OCC1OC1c2ccc(OCC1OC1)cc2</chem>      |  |

## Reference

- S1. J. Wang, C. He, P. Wu, J. Wang and C. Duan, *J. Am. Chem. Soc.* 2011, **133**, 12402-12405.
- S2. Z. Qin, H. Li, X. Yang, L. Chen, Y. Li, K. Shen, *Appl. Catal. B Environ.*, 2022, **307**, 121163.
- S3. J. Kurisingal, Y. Rachuri, Y. Gu, R. Chitumalla, S. Vuppala, J. Jang, K. K. Bisht, E. Suresh, D.-W. Park, *ACS Sustainable Chem. Eng.*, 2020, **8**, 10822–10832.
- S4. Y. Sun, H. Huang, H. Vardhan, B. Aguila, C. Zhong, J. Perman, A. Al-Enizi, A. Nafady, S. Ma, *ACS Appl. Mater. Interfaces*, 2018, **10**, 27124–27130.
- S5. M. Ding, H.-L. Jiang, *ACS Catal.*, 2018, **8**, 3194–3201.
- S6. L. Ding, B. Yao, W. Jiang, J. Li, Q. Fu, Y. Li, Z. Liu, J. Ma, Y. Dong, *Inorg. Chem.*, 2017, **56**, 2337–2344.
- S7. J. Liang, R.-P. Chen, X.-Y. Wang, T.-T. Liu, X.-S. Wang, Y.-B. Huang, R. Cao, *Chem. Sci.*, 2017, **8**, 1570–1575.
- S8. Q.-Q. Zhu, W.-W. Zhang, H.-W. Zhang, Y. Yuan, R. Yuan, F. Sun, H. He, *Inorg. Chem.*, 2019, **58**, 15637–15643.
- S9. W. Song, S. Song, X. Feng, Q. Yu, X. Dong, M. Chen, *J. Chem. Sci.*, 2020, **132**, 85.
- S10. A.K. Gupta, N. Guha, S. Krishnan, P. Mathur, D.K. Rai, *J. CO<sub>2</sub> Util.*, 2020, **39**, 101173.
- S11. J. Li, W.-J. Li, S.-C. Xu, B. Li, Y. Tang, Z.-F. Lin, *Inorg. Chem. Commun.*, 2019, **106**, 70–75.

- S12. Q.-Q. Zhu, W.-W. Zhang, H.-W. Zhang, Y. Yuan, R. Yuan, F. Sun, H. He, *Inorg. Chem.*, 2019, **58**, 15637–15643.
- S13. V. Gupta, S. K. Mandal, *Inorg. Chem.*, 2020, **59**, 4273–4281.
- S14. H. Xu, C.-S. Cao, H.-S. Hu, S.-B. Wang, J.-C. Liu, P. Cheng, N. Kaltsoyannis, J. Li, B. Zhao, *Angew. Chem. Int. Ed.*, 2019, **58**, 6022–6027.
- S15. J. Liang, Y.-Q. Xie, X.-S. Wang, Q. Wang, T.-T. Liu, Y.-B. Huang, R. Cao, *Chem. Commun.*, 2018, **54**, 342–345.
- S16. W. Qiao, T. Song, B. Zhao, *Chin. J. Chem.*, 2019, **37**, 474–478.
- S17. X. Sun, L. Shi, H. Hu, H. Huang, T. Ma, *Adv. Sustainable Syst.*, 2020, **4**, 2000098.
- S18. W.-M. Wang, W.-T. Wang, M.-Y. Wang, A.-L. Gu, T.-D. Hu, Y.-X. Zhang, Z.-L. Wu, *Inorg. Chem.*, 2021, **60**, 9122–9131.
